# Supplementary material
Source: publisher figshare collection journal article supplement (https://diabetesjournals.figshare.com/articles/dataset/_/12841109)
Supplement: Supplementary file 1 [file 1]

## Sheet: Checklist for Publications
Checklist for Reporting Human Islet Preparations Used in Research
Adapted from Hart NJ, Powers AC (2018) Progress, challenges, and suggestions for using human islets to understand islet biology and human diabetes. Diabetologia https://doi.org/10.1007/s00125-018-4772-2.
Report Downloaded on 3/2/2020 7:45:58 AM
Data provided by IIDP and Prodo Labs
Manuscript DOI: [insert manuscript submission number]
Title	Intracrine testosterone activation in human pancreatic β cells stimulates insulin secretion
Author list	Weiwei Xu, Lina Schiffer, M.M. Fahd Qadir, Yanqing Zhang, Paula Mota De Sa, Brian G Keevil, Hongju Wu, Wiebke Arlt, Franck Mauvais-Jarvis
Corresponding author	Franck Mauvais-Jarvis
Email address	fmauvais@tulane.edu
MANDATORY INFORMATION
cols
Unique identifier	SAMN08776504	SAMN08786256	SAMN10357324	SAMN10374868	SAMN10869303	SAMN11244711	SAMN11250012	SAMN11522709	SAMN11578698	SAMN11633049	SAMN11864195	SAMN12496804	SAMN12633894	SAMN13938639	HP-20043-01
Donor Age (years)	48	53	44	58	25	56	57	51	57	48	53	40	57	50	64
Donor Sex (M/F)	F	F	M	M	M	F	F	M	M	M	F	F	F	F	F
Donor BMI (kg/m2)	32.3	33.2	40.0	32.4	27.7	39.5	29.2	26.7	25.8	38.8	40.0	30.4	32.9	39.2	17.2
Donor HbA1c	Not Reported	Not Reported	5.7	5.0	5.2	5.8	5.2	5.7	5.7	5.4	5.5	5.0	5.7	5.0	5.3
Origin/source of islets	IIDP	IIDP	IIDP	IIDP	IIDP	IIDP	IIDP	IIDP	IIDP	IIDP	IIDP	IIDP	IIDP	IIDP	Prodo Labs
Islet isolation centera	University of Pennsylvania	The Scharp-Lacy Research Institute	Southern California Islet Cell Resource Center	University of Wisconsin	The Scharp-Lacy Research Institute	University of Wisconsin	University of Miami	Southern California Islet Cell Resource Center	The Scharp-Lacy Research Institute	University of Wisconsin	University of Wisconsin	University of Miami	Southern California Islet Cell Resource Center	Southern California Islet Cell Resource Center	Prodo Labs
Donor history of diabetes? Yes/No	No	No	No	No	No	No	No	No	No	No	No	No	No	No	No
If Yes, complete the next two lines if this information is available
Diabetes duration (years)	Not Applicable	Not Applicable	Not Applicable	Not Applicable	Not Applicable	Not Applicable	Not Applicable	Not Applicable	Not Applicable	Not Applicable	Not Applicable	Not Applicable	Not Applicable	Not Applicable	Not Applicable
Glucose-lowering therapy at time of deathb	Not Applicable	Not Applicable	Not Applicable	Not Applicable	Not Applicable	Not Applicable	Not Applicable	Not Applicable	Not Applicable	Not Applicable	Not Applicable	Not Applicable	Not Applicable	Not Applicable	Not Applicable
RECOMMENDED INFORMATION
Cause of death	Cerebrovascular/stroke	Cerebrovascular/stroke	Cerebrovascular/stroke	Head trauma	Anoxia	Cerebrovascular/stroke	Cerebrovascular/stroke	Anoxia	Cerebrovascular/stroke	Cerebrovascular/stroke	Cerebrovascular/stroke	Cerebrovascular/stroke	Cerebrovascular/stroke	Cerebrovascular/stroke	Cerebrovascular/stroke
Warm ischemia time (h)	Not Reported	Not Reported	Not Reported	Not Reported	0.5	Not Reported	0.1	0.7	Not Reported	Not Reported	Not Reported	Not Reported	0.2	Not Reported
Cold ischemia time (h)	13.3	7.7	7.5	6.2	8.4	9.5	9.3	6.4	6.8	12.5	6.7	8.5	5.9	11.6
Estimated purity (%) By islet isolation center at time of shipment with Dithizone (DTZ) staining per IIDP SOP	85	85	75	86	90	94	90	85	95	90	92	90	85	80	95
Estimated viability (%) By islet isolation center at time of broadcast with Fluorescence Diacetate/Propidium Iodide (FDA/PI) staining per IIDP SOP	81	95	96	97	95	98	94	96	95	98	98	92	96	95	95
Total culture time(h)c Calculate[start date/time of experiment]-[date/ time islet culture began (below)]	Not Reported	Not Reported	Not Reported	Not Reported	Not Reported	Not Reported	Not Reported	Not Reported	Not Reported	Not Reported	Not Reported	Not Reported	Not Reported	Not Reported	48hrs
Date/Time Islet Culture Began at islet isolation center (Pacific Standard Time, 24-hour format)	Not Reported	Not Reported	2018-10-31 09:00	2018-11-05 01:00	2019-01-30 19:33	2019-03-23 18:30	2019-03-22 22:00	2019-04-28 01:00	2019-05-02 17:00	2019-05-12 17:45	2019-05-26 10:45	2019-08-02 15:00	2019-08-24 23:45	2020-01-28 01:30	2020-02-19 02:30:00
Glucose-stimulated insulin secretion or other functional measurementd Stimulation Index (SI) by static incubation at islet isolation center pre-shipment per IIDP SOP	SI (G2.8mM-G28mM)= 1.6	SI (G2.8mM-G28mM)= Not Reported	SI (G2.8mM-G28mM)= 1.7	SI (G2.8mM-G28mM)= 3.0	SI (G2.8mM-G28mM)= 8.9	SI (G2.8mM-G28mM)= 5.3	SI (G2.8mM-G28mM)= 1.9	SI (G2.8mM-G28mM)= 1.9	SI (G2.8mM-G28mM)= 4.4	SI (G2.8mM-G28mM)= 3.2	SI (G2.8mM-G28mM)= 2.4	SI (G2.8mM-G28mM)= 1.0	SI (G2.8mM-G28mM)= 1.8	SI (G2.8mM-G28mM)= Not Reported	SI (G2.8mM-G28mM)= Not Reported
Glucose-stimulated insulin secretion or other functional measurement Area Under the Curve (AUC) by perifusion at HIPP post shipment sample per HIPP SOP	AUC (G5.6mM-G16.7mM)= Not Available	AUC (G5.6mM-G16.7mM)= Not Available	AUC (G5.6mM-G16.7mM)= 49.0 (ng/100 IEQs)	AUC (G5.6mM-G16.7mM)= 41.1 (ng/100 IEQs)	AUC (G5.6mM-G16.7mM)= Not Available	AUC (G5.6mM-G16.7mM)= Not Available	AUC (G5.6mM-G16.7mM)= 6.6 (ng/100 IEQs)	AUC (G5.6mM-G16.7mM)= 34.4 (ng/100 IEQs)	AUC (G5.6mM-G16.7mM)= 49.9 (ng/100 IEQs)	AUC (G5.6mM-G16.7mM)= 33.8 (ng/100 IEQs)	AUC (G5.6mM-G16.7mM)= 11.5 (ng/100 IEQs)	AUC (G5.6mM-G16.7mM)= Not Available	AUC (G5.6mM-G16.7mM)= 21.8 (ng/100 IEQs)	AUC (G5.6mM-G16.7mM)= Not reported	AUC (G5.6mM-G16.7mM)= Not reported
*Shipments of more than one batch type were received from this islet isolation
aFor example, IIDP, ECIT, Alberta IsletCore
bPlease specify the therapy/therapies
cTime of islet culture at the isolation centre, during shipment and at the receiving laboratory
dPlease specify the test and the results
